# Supplementary material
Source: PubMed Central journal article supplement (PMC4528533)
Supplement: rspb20151217supp1.pdf [file rspb20151217supp1.pdf]

1 **Electronic Supplementary Material 1 (ESM1):** Isolation by Resistance Across a Complex Coral  
2 Reef Seascape  
3  
4 Table S1 Descriptive statistics of 15 sample sites across the Houtman Abrolhos Islands: sample  
5 sizes ( $N$ ), number of multi-locus genotypes ( $G$ ), allelic richness ( $A_R$ ), observed ( $H_O$ ) and expected  
6 ( $H_E$ ) heterozygosity and inbreeding coefficients ( $F_{IS}$ ). Bold values indicate significance  
7 ( $P \leq 0.05$ ).  
8  
9 Table S2 Microsatellite marker information with amplification protocols.  
10  
11 Table S3 Biophysical dispersal model parameters.  
12  
13 Table S4 Allele frequencies per locus at each sample site.  
14  
15 Table S5 Pairwise  $D_{est}$  values.  
16  
17 Table S6 Larval migration matrix of standardised dispersal probabilities.  
18  
19 Table S7 Results from Jackknifing tests across loci.  
20  
21 Figure S1 Principle component analyses of three measures of genetic differentiation ( $F_{ST}$ ,  $G_{ST}$ ,  
22  $D_{est}$ ).  
23  
24 Figure S2 Results from GENELAND analysis identifying  $K = 3$  as the most likely number of  
25 clusters in the dataset.  
26  
27 Figure S3 Scatterplot showing the relationship between genetic distance matrices based on  
28 subsampled v. entire dataset.  
29  
30 Figure S4 Matrix of similarity (Nei 1987) based on the forward projected migration matrix  
31 standardised migration matrix at  $t = 0$  (above) and when forward projected 10 generations  
32 (below). Red indicates high levels of similarity and blue low levels of similarity. The matrix is  
33 symmetric and so non-directional.  
34  
35 Figure S5 Histograms showing distribution of  $P$ -values from the Mantel tests based on the  
36 subsampled dataset. Asterisks indicate  $p$  values using the full dataset.  
37  
38 Text S1 Details of the calculations for the forward projection matrix  
39

40 Table 1 Descriptive statistics of 15 sample sites across the Houtman Abrolhos Islands: sample  
 41 sizes ( $N$ ), number of multi-locus genotypes ( $G$ ), allelic richness ( $A_R$ ), observed ( $H_O$ ) and expected  
 42 ( $H_E$ ) heterozygosity and inbreeding coefficients ( $F_{IS}$ ). Bold values indicate significance  
 43 ( $P \leq 0.05$ ).  
 44

| Group           | Site | Latitude | Longitude | $N$ | $G$ | $A_R$ | $H_O$ | $H_E$ | $F_{IS}$     |
|-----------------|------|----------|-----------|-----|-----|-------|-------|-------|--------------|
| <i>Pelsaert</i> | P1   | -28.869  | 113.877   | 16  | 16  | 3.513 | 0.604 | 0.637 | 0.040        |
|                 | P2   | -28.898  | 113.923   | 14  | 14  | 3.327 | 0.610 | 0.594 | 0.012        |
|                 | P3   | -28.867  | 113.970   | 18  | 18  | 3.693 | 0.572 | 0.668 | <b>0.175</b> |
|                 | P4   | -28.862  | 113.988   | 14  | 14  | 3.217 | 0.500 | 0.591 | <b>0.109</b> |
|                 | P5   | -28.815  | 113.948   | 16  | 15  | 3.554 | 0.638 | 0.624 | 0.033        |
| <i>Easter</i>   | E1   | -28.650  | 113.880   | 30  | 29  | 3.879 | 0.533 | 0.653 | <b>0.181</b> |
|                 | E2   | -28.699  | 113.780   | 25  | 25  | 3.903 | 0.597 | 0.644 | 0.102        |
|                 | E3   | -28.716  | 113.789   | 33  | 32  | 3.818 | 0.609 | 0.648 | 0.087        |
|                 | E4   | -28.740  | 113.809   | 26  | 26  | 3.810 | 0.600 | 0.654 | 0.091        |
|                 | E5   | -28.737  | 113.789   | 30  | 30  | 3.643 | 0.547 | 0.639 | <b>0.143</b> |
| <i>Wallabi</i>  | W1   | -28.473  | 113.776   | 38  | 36  | 3.691 | 0.587 | 0.656 | 0.127        |
|                 | W2   | -28.480  | 113.784   | 24  | 20  | 3.812 | 0.629 | 0.663 | 0.049        |
|                 | W3   | -28.499  | 113.746   | 44  | 44  | 3.730 | 0.576 | 0.669 | <b>0.152</b> |
|                 | W4   | -28.435  | 113.743   | 37  | 30  | 3.395 | 0.597 | 0.617 | 0.009        |
|                 | W5   | -28.407  | 113.719   | 30  | 30  | 3.740 | 0.640 | 0.673 | <b>0.067</b> |

Table S2 Multiplex details and thermocycling conditions for the panel of microsatellite markers

| Locus                  | Primer Sequence (5'-3')                               | Primer [10 $\mu$ M] | vol | Flourescent tag | Multiplex |
|------------------------|-------------------------------------------------------|---------------------|-----|-----------------|-----------|
| Amil2_018 <sup>1</sup> | F-GCCCTCCTTAGGTGATTTAC<br>R- ATCGTTTTGAGCAATCAGAC     | 0.375               |     | 6-FAM           | 1         |
| EST_063 <sup>2</sup>   | F-TATTGTAGTCGTTACGTAGGCT<br>R-AACAATCGTGCATACTAGCTCA  | 0.065               |     | VIC             | 1         |
| Amil2_022 <sup>1</sup> | F-CTGTGGCCTTGTTAGATAGC<br>R-AGATTTGTGTTGTCCTGCTT      | 0.065               |     | VIC             | 1         |
| Amil2_002 <sup>1</sup> | F-ACAAAATAACCCCTTCTACCT<br>R-CTTCATCTCTACAGCCGATT     | 0.100               |     | 6-FAM           | 2         |
| EST_181 <sup>2</sup>   | F-TGATTGCTGAGAAAGCTAGAGAT<br>R-GCCTCACCTTGCCTTGCTACA  | 0.100               |     | VIC             | 2         |
| EST_254 <sup>2</sup>   | F-GGTGACCAATCAGAGTCTTGA<br>R--TACACTTGCTATAGTAACTTGCT | 0.125               |     | PET             | 2         |
| EST_016 <sup>2</sup>   | F-CTATCTGTGTATGATCAGGACTA<br>R-TCCATCTGTTGTGGAAACTGGT | 0.100               |     | 6-FAM           | 3         |
| WGS_153 <sup>2</sup>   | F- TTCCAAGTTGCTGTGAGTACA<br>R-CGGGTGCTAAGCTTGCTCAA    | 0.175               |     | VIC             | 3         |
| EST_245 <sup>2</sup>   | F-CAGAATGATATTTCTGCAGCACT<br>R-CGCAATCGAGATTATAGGAAGA | 0.200               |     | VIC             | 4         |
| EST_098 <sup>2</sup>   | F-ACAAATTGCGCTCAAGTTGATG<br>R-ACGGCTGCGAAGGAGTCTAGT   | 0.050               |     | VIC             | 4         |

**Thermocycling conditions** for multiplexes are as follows: Initial activation step for 15 min at 95°C, followed by 35 cycles of denaturing for 30sec at 94°C, annealing for 90s at 50°C (Multiplex 1, 2, 3) or 60°C (Multiplex 4) and extension for 90s at 72°C, and a final extension step for 10min at 72°C. Primers from <sup>1</sup>vanOppen et al. (2007) and <sup>2</sup>Wang et al. (2009)

Table S3 Biophysical dispersal model parameters.

| Parameter            | Setting     | Description                           |
|----------------------|-------------|---------------------------------------|
| elSp                 | 1           | Release spacing                       |
| relSpUnits           | Days        |                                       |
| relDuration          | 8           | Maximum duration of a release         |
| relDurationUnits     | Days        |                                       |
| competencyStart      | 3           | Date of settling eligibility          |
| competencyStartUnits | Days        |                                       |
| settleChkFreq        | 1           | Frequency of checking for settlement  |
| settleChkFreqUnits   | Days        |                                       |
| outputFreq           | 6           | Frequency of output                   |
| outputFreqUnits      | Hours       |                                       |
| vmgrt                | FALSE       | Include vertical migration behaviour? |
| mrate                | 0.06        | Mortality rate                        |
| mUnits               | Days        |                                       |
| mortalityType        | Exponential |                                       |
| diffusionType        | Simple      |                                       |
| settlementType       | FloatOver   |                                       |
| initialPositionType  | Centroid    |                                       |

Table S4 Diversity indices of the microsatellite markers at each sample site.

|    |                 | Amil2_018 | EST_063 | Amil2_022 | Amil2_002 | EST_181 | EST_245 | EST_016 | WGS_153 | EST_254 | EST_98 |
|----|-----------------|-----------|---------|-----------|-----------|---------|---------|---------|---------|---------|--------|
| P1 | N               | 16        | 16      | 16        | 16        | 16      | 16      | 16      | 16      | 15      | 16     |
|    | N <sub>A</sub>  | 3         | 3       | 7         | 5         | 9       | 9       | 5       | 6       | 6       | 7      |
|    | N <sub>E</sub>  | 1.135     | 1.636   | 3.507     | 3.683     | 3.391   | 6.024   | 3.436   | 5.172   | 4.737   | 3.631  |
|    | H <sub>O</sub>  | 0.125     | 0.375   | 0.563     | 0.625     | 0.813   | 0.750   | 0.688   | 0.813   | 0.200   | 0.688  |
|    | H <sub>E</sub>  | 0.119     | 0.389   | 0.715     | 0.729     | 0.705   | 0.834   | 0.709   | 0.807   | 0.789   | 0.725  |
|    | F <sub>IS</sub> | -0.049    | 0.035   | 0.213     | 0.142     | -0.152  | 0.101   | 0.030   | -0.007  | 0.746   | 0.051  |
| P2 | N               | 14        | 14      | 14        | 14        | 14      | 14      | 14      | 12      | 14      | 14     |
|    | N <sub>A</sub>  | 3         | 2       | 4         | 5         | 9       | 10      | 4       | 5       | 4       | 7      |
|    | N <sub>E</sub>  | 1.156     | 1.415   | 3.039     | 2.178     | 4.723   | 7.686   | 2.631   | 4.056   | 2.465   | 3.063  |
|    | H <sub>O</sub>  | 0.143     | 0.214   | 0.571     | 0.643     | 0.857   | 0.857   | 0.643   | 0.917   | 0.357   | 0.643  |
|    | H <sub>E</sub>  | 0.135     | 0.293   | 0.671     | 0.541     | 0.788   | 0.870   | 0.620   | 0.753   | 0.594   | 0.673  |
|    | F <sub>IS</sub> | -0.057    | 0.270   | 0.148     | -0.189    | -0.087  | 0.015   | -0.037  | -0.217  | 0.399   | 0.045  |
| P3 | N               | 18        | 18      | 18        | 18        | 18      | 17      | 18      | 15      | 17      | 18     |
|    | N <sub>A</sub>  | 6         | 3       | 10        | 4         | 11      | 8       | 6       | 7       | 4       | 8      |
|    | N <sub>E</sub>  | 1.427     | 1.906   | 4.235     | 2.339     | 5.445   | 5.070   | 3.465   | 5.000   | 1.710   | 4.349  |
|    | H <sub>O</sub>  | 0.167     | 0.333   | 0.778     | 0.389     | 0.667   | 0.824   | 0.722   | 0.600   | 0.176   | 0.667  |
|    | H <sub>E</sub>  | 0.299     | 0.475   | 0.764     | 0.573     | 0.816   | 0.803   | 0.711   | 0.800   | 0.415   | 0.770  |
|    | F <sub>IS</sub> | 0.443     | 0.299   | -0.018    | 0.321     | 0.183   | -0.026  | -0.015  | 0.250   | 0.575   | 0.134  |
| P4 | N               | 14        | 14      | 13        | 14        | 14      | 14      | 14      | 11      | 10      | 14     |
|    | N <sub>A</sub>  | 5         | 2       | 7         | 3         | 9       | 9       | 5       | 5       | 4       | 6      |
|    | N <sub>E</sub>  | 1.352     | 1.324   | 2.541     | 1.840     | 5.091   | 6.323   | 2.722   | 3.408   | 2.667   | 4.356  |
|    | H <sub>O</sub>  | 0.286     | 0.286   | 0.385     | 0.500     | 0.714   | 0.857   | 0.500   | 0.545   | 0.100   | 0.429  |
|    | H <sub>E</sub>  | 0.260     | 0.245   | 0.607     | 0.457     | 0.804   | 0.842   | 0.633   | 0.707   | 0.625   | 0.770  |
|    | F <sub>IS</sub> | -0.098    | -0.167  | 0.366     | -0.095    | 0.111   | -0.018  | 0.210   | 0.228   | 0.840   | 0.444  |
| P5 | N               | 13        | 15      | 15        | 15        | 15      | 15      | 15      | 15      | 13      | 15     |
|    | N <sub>A</sub>  | 2         | 4       | 6         | 6         | 9       | 8       | 5       | 6       | 6       | 9      |
|    | N <sub>E</sub>  | 1.080     | 1.320   | 3.879     | 4.286     | 4.787   | 5.625   | 3.435   | 3.913   | 3.159   | 3.659  |
|    | H <sub>O</sub>  | 0.077     | 0.267   | 0.867     | 0.533     | 0.867   | 0.733   | 0.800   | 0.733   | 0.308   | 0.867  |
|    | H <sub>E</sub>  | 0.074     | 0.242   | 0.742     | 0.767     | 0.791   | 0.822   | 0.709   | 0.744   | 0.683   | 0.727  |
|    | F <sub>IS</sub> | -0.040    | -0.101  | -0.168    | 0.304     | -0.096  | 0.108   | -0.129  | 0.015   | 0.550   | -0.193 |
| E1 | N               | 28        | 29      | 28        | 29        | 29      | 29      | 29      | 29      | 28      | 29     |
|    | N <sub>A</sub>  | 4         | 3       | 8         | 6         | 12      | 10      | 5       | 7       | 5       | 8      |
|    | N <sub>E</sub>  | 1.456     | 1.503   | 2.266     | 2.905     | 6.728   | 6.007   | 3.831   | 5.965   | 2.761   | 4.237  |
|    | H <sub>O</sub>  | 0.250     | 0.276   | 0.429     | 0.483     | 0.862   | 0.690   | 0.655   | 0.448   | 0.214   | 0.655  |
|    | H <sub>E</sub>  | 0.313     | 0.335   | 0.559     | 0.656     | 0.851   | 0.834   | 0.739   | 0.832   | 0.638   | 0.764  |
|    | F <sub>IS</sub> | 0.202     | 0.176   | 0.233     | 0.264     | -0.013  | 0.173   | 0.113   | 0.461   | 0.664   | 0.142  |
| E2 | N               | 25        | 25      | 25        | 25        | 25      | 24      | 25      | 20      | 22      | 25     |
|    | N <sub>A</sub>  | 4         | 2       | 6         | 6         | 10      | 11      | 5       | 8       | 6       | 9      |
|    | N <sub>E</sub>  | 1.130     | 1.523   | 4.072     | 2.694     | 5.388   | 6.698   | 3.086   | 6.154   | 3.006   | 4.386  |
|    | H <sub>O</sub>  | 0.080     | 0.280   | 0.840     | 0.560     | 0.880   | 0.833   | 0.640   | 0.700   | 0.182   | 0.560  |
|    | H <sub>E</sub>  | 0.115     | 0.343   | 0.754     | 0.629     | 0.814   | 0.851   | 0.676   | 0.838   | 0.667   | 0.772  |
|    | F <sub>IS</sub> | 0.306     | 0.184   | -0.113    | 0.109     | -0.081  | 0.020   | 0.053   | 0.164   | 0.728   | 0.275  |
| E3 | N               | 31        | 31      | 31        | 32        | 32      | 31      | 32      | 29      | 30      | 32     |
|    | N <sub>A</sub>  | 6         | 4       | 6         | 6         | 12      | 12      | 6       | 7       | 4       | 8      |
|    | N <sub>E</sub>  | 1.405     | 1.569   | 3.668     | 2.260     | 5.737   | 7.479   | 3.871   | 5.570   | 2.899   | 2.805  |
|    | H <sub>O</sub>  | 0.194     | 0.323   | 0.677     | 0.438     | 0.844   | 0.903   | 0.688   | 0.724   | 0.033   | 0.688  |
|    | H <sub>E</sub>  | 0.288     | 0.363   | 0.727     | 0.558     | 0.826   | 0.866   | 0.742   | 0.820   | 0.655   | 0.644  |
|    | F <sub>IS</sub> | 0.329     | 0.110   | 0.069     | 0.215     | -0.022  | -0.043  | 0.073   | 0.117   | 0.949   | -0.068 |
| E4 | N               | 25        | 26      | 26        | 26        | 26      | 26      | 26      | 20      | 20      | 26     |
|    | N <sub>A</sub>  | 4         | 2       | 6         | 6         | 10      | 9       | 5       | 7       | 4       | 7      |
|    | N <sub>E</sub>  | 1.397     | 1.649   | 3.808     | 2.174     | 4.678   | 7.596   | 3.431   | 5.517   | 2.484   | 4.036  |
|    | H <sub>O</sub>  | 0.240     | 0.385   | 0.769     | 0.346     | 0.769   | 0.769   | 0.769   | 0.700   | 0.250   | 0.654  |
|    | H <sub>E</sub>  | 0.284     | 0.393   | 0.737     | 0.540     | 0.786   | 0.868   | 0.709   | 0.819   | 0.598   | 0.752  |
|    | F <sub>IS</sub> | 0.155     | 0.023   | -0.043    | 0.359     | 0.022   | 0.114   | -0.086  | 0.145   | 0.582   | 0.131  |
| E5 | N               | 30        | 30      | 30        | 30        | 30      | 30      | 30      | 26      | 29      | 30     |
|    | N <sub>A</sub>  | 4         | 4       | 7         | 6         | 10      | 10      | 6       | 10      | 6       | 8      |
|    | N <sub>E</sub>  | 1.506     | 1.410   | 2.885     | 2.479     | 5.114   | 6.228   | 4.138   | 6.288   | 3.025   | 2.736  |
|    | H <sub>O</sub>  | 0.200     | 0.333   | 0.633     | 0.433     | 0.767   | 0.700   | 0.667   | 0.692   | 0.103   | 0.500  |
|    | H <sub>E</sub>  | 0.336     | 0.291   | 0.653     | 0.597     | 0.804   | 0.839   | 0.758   | 0.841   | 0.669   | 0.634  |
|    | F <sub>IS</sub> | 0.405     | -0.147  | 0.031     | 0.274     | 0.047   | 0.166   | 0.121   | 0.177   | 0.845   | 0.212  |
| W1 | N               | 36        | 36      | 34        | 36        | 35      | 34      | 36      | 32      | 30      | 35     |
|    | N <sub>A</sub>  | 5         | 2       | 10        | 4         | 11      | 10      | 7       | 6       | 6       | 8      |
|    | N <sub>E</sub>  | 1.461     | 1.564   | 3.375     | 2.296     | 5.684   | 6.964   | 3.465   | 4.785   | 2.299   | 4.083  |
|    | H <sub>O</sub>  | 0.250     | 0.250   | 0.529     | 0.472     | 0.829   | 0.853   | 0.778   | 0.688   | 0.167   | 0.629  |
|    | H <sub>E</sub>  | 0.316     | 0.361   | 0.704     | 0.564     | 0.824   | 0.856   | 0.711   | 0.791   | 0.565   | 0.755  |

|    |                 |        |        |        |        |        |        |        |       |       |        |
|----|-----------------|--------|--------|--------|--------|--------|--------|--------|-------|-------|--------|
| W2 | F <sub>IS</sub> | 0.208  | 0.307  | 0.248  | 0.163  | -0.005 | 0.004  | -0.093 | 0.131 | 0.705 | 0.168  |
|    | N               | 20     | 20     | 19     | 20     | 20     | 19     | 20     | 16    | 17    | 20     |
|    | N <sub>A</sub>  | 3      | 3      | 7      | 5      | 11     | 10     | 6      | 8     | 4     | 8      |
|    | N <sub>E</sub>  | 1.227  | 1.629  | 3.438  | 3.162  | 7.407  | 6.748  | 3.361  | 5.278 | 2.388 | 4.420  |
|    | H <sub>O</sub>  | 0.200  | 0.350  | 0.579  | 0.450  | 0.950  | 0.895  | 0.750  | 0.688 | 0.118 | 0.800  |
| W3 | H <sub>E</sub>  | 0.185  | 0.386  | 0.709  | 0.684  | 0.865  | 0.852  | 0.703  | 0.811 | 0.581 | 0.774  |
|    | F <sub>IS</sub> | -0.081 | 0.094  | 0.184  | 0.342  | -0.098 | -0.050 | -0.068 | 0.152 | 0.798 | -0.034 |
|    | N               | 41     | 42     | 43     | 44     | 44     | 40     | 44     | 36    | 43    | 44     |
|    | N <sub>A</sub>  | 6      | 3      | 9      | 5      | 11     | 10     | 8      | 8     | 4     | 8      |
|    | N <sub>E</sub>  | 1.431  | 1.946  | 3.587  | 2.484  | 4.593  | 6.987  | 3.975  | 4.809 | 2.387 | 3.759  |
| W4 | H <sub>O</sub>  | 0.220  | 0.357  | 0.605  | 0.614  | 0.795  | 0.875  | 0.727  | 0.556 | 0.163 | 0.432  |
|    | H <sub>E</sub>  | 0.301  | 0.486  | 0.721  | 0.597  | 0.782  | 0.857  | 0.748  | 0.792 | 0.581 | 0.734  |
|    | F <sub>IS</sub> | 0.271  | 0.265  | 0.162  | -0.027 | -0.017 | -0.021 | 0.028  | 0.299 | 0.720 | 0.412  |
|    | N               | 29     | 30     | 30     | 30     | 30     | 28     | 30     | 29    | 27    | 29     |
|    | N <sub>A</sub>  | 4      | 2      | 6      | 4      | 11     | 8      | 7      | 7     | 5     | 7      |
| W5 | N <sub>E</sub>  | 1.285  | 1.471  | 2.894  | 2.016  | 5.590  | 5.873  | 2.970  | 5.224 | 2.651 | 3.564  |
|    | H <sub>O</sub>  | 0.241  | 0.333  | 0.600  | 0.600  | 0.867  | 0.786  | 0.667  | 0.552 | 0.074 | 0.621  |
|    | H <sub>E</sub>  | 0.222  | 0.320  | 0.654  | 0.504  | 0.821  | 0.830  | 0.663  | 0.809 | 0.623 | 0.719  |
|    | F <sub>IS</sub> | -0.088 | -0.042 | 0.083  | -0.191 | -0.055 | 0.053  | -0.005 | 0.318 | 0.881 | 0.137  |
|    | N               | 30     | 30     | 30     | 30     | 30     | 30     | 29     | 23    | 28    | 29     |
|    | N <sub>A</sub>  | 6      | 3      | 8      | 6      | 7      | 11     | 6      | 6     | 5     | 8      |
|    | N <sub>E</sub>  | 1.542  | 1.542  | 3.711  | 3.719  | 4.569  | 5.844  | 3.780  | 4.831 | 2.667 | 4.123  |
|    | H <sub>O</sub>  | 0.200  | 0.367  | 0.733  | 0.633  | 0.767  | 0.800  | 0.828  | 0.739 | 0.214 | 0.690  |
|    | H <sub>E</sub>  | 0.352  | 0.352  | 0.731  | 0.731  | 0.781  | 0.829  | 0.735  | 0.793 | 0.625 | 0.757  |
|    | F <sub>IS</sub> | 0.431  | -0.043 | -0.004 | 0.134  | 0.018  | 0.035  | -0.125 | 0.068 | 0.657 | 0.089  |

Table S5 Values of genetic differentiation ( $D_{est}$ ) for 15 sample sites across the Houtman Abrolhos Islands. Significance values are above diagonal and bold values indicate significance based on a Bonferroni adjusted  $P$ -value of 0.005.  $D_{est}$  was strongly correlated with  $G'_{ST}$  ( $R = 0.998, P = 0.001$ ).

|    | P1     | P2     | P3    | P4           | P5           | E1     | E2           | E3           | E4           | E5    | W1    | W2    | W3           | W4           | W5    |
|----|--------|--------|-------|--------------|--------------|--------|--------------|--------------|--------------|-------|-------|-------|--------------|--------------|-------|
| P1 |        | 0.402  | 0.018 | <b>0.001</b> | 0.404        | 0.554  | 0.806        | 0.034        | 0.140        | 0.447 | 0.158 | 0.314 | 0.142        | 0.248        | 0.628 |
| P2 | 0.003  |        | 0.033 | 0.010        | 0.005        | 0.420  | 0.759        | 0.631        | 0.752        | 0.628 | 0.852 | 0.236 | 0.404        | 0.374        | 0.289 |
| P3 | 0.046  | 0.041  |       | 0.476        | <b>0.001</b> | 0.022  | 0.008        | <b>0.000</b> | 0.001        | 0.001 | 0.012 | 0.013 | 0.007        | <b>0.000</b> | 0.004 |
| P4 | 0.091  | 0.053  | 0.000 |              | <b>0.000</b> | 0.008  | <b>0.001</b> | <b>0.000</b> | <b>0.000</b> | 0.001 | 0.009 | 0.001 | <b>0.001</b> | <b>0.000</b> | 0.003 |
| P5 | 0.002  | 0.054  | 0.091 | 0.101        |              | 0.008  | 0.085        | 0.001        | 0.001        | 0.003 | 0.003 | 0.013 | <b>0.000</b> | 0.002        | 0.244 |
| E1 | -0.004 | 0.002  | 0.037 | 0.052        | 0.048        |        | 0.647        | 0.030        | 0.116        | 0.476 | 0.690 | 0.313 | 0.041        | 0.144        | 0.457 |
| E2 | -0.012 | -0.010 | 0.044 | 0.070        | 0.020        | -0.005 |              | 0.613        | 0.859        | 0.354 | 0.894 | 0.429 | 0.157        | 0.314        | 0.454 |
| E3 | 0.026  | -0.005 | 0.073 | 0.096        | 0.070        | 0.022  | -0.003       |              | 0.717        | 0.120 | 0.588 | 0.070 | 0.156        | 0.022        | 0.017 |
| E4 | 0.016  | -0.010 | 0.064 | 0.086        | 0.064        | 0.014  | -0.011       | -0.006       |              | 0.064 | 0.701 | 0.181 | 0.700        | 0.043        | 0.067 |
| E5 | 0.000  | -0.006 | 0.060 | 0.071        | 0.054        | -0.001 | 0.003        | 0.011        | 0.018        |       | 0.438 | 0.146 | 0.014        | 0.127        | 0.087 |
| W1 | 0.013  | -0.014 | 0.039 | 0.048        | 0.056        | -0.006 | -0.011       | -0.003       | -0.005       | 0.001 |       | 0.067 | 0.306        | 0.081        | 0.311 |
| W2 | 0.007  | 0.011  | 0.047 | 0.079        | 0.043        | 0.006  | 0.002        | 0.018        | 0.013        | 0.013 | 0.020 |       | 0.037        | 0.075        | 0.189 |
| W3 | 0.015  | 0.002  | 0.043 | 0.073        | 0.079        | 0.020  | 0.010        | 0.009        | -0.006       | 0.024 | 0.004 | 0.025 |              | 0.004        | 0.005 |
| W4 | 0.008  | 0.003  | 0.102 | 0.101        | 0.058        | 0.011  | 0.004        | 0.022        | 0.019        | 0.011 | 0.014 | 0.019 | 0.032        |              | 0.096 |
| W5 | -0.005 | 0.008  | 0.051 | 0.064        | 0.009        | 0.000  | 0.001        | 0.026        | 0.018        | 0.015 | 0.004 | 0.011 | 0.030        | 0.013        |       |

Table S6 Migration Matrix of standardized probabilities of dispersal between sampling locations. Particles were considered to recruit to a sample site if they fell within a 1km buffer around each location within the recruitment eligibility window. Source of larvae are in columns and sinks are in rows. Data is from spawning across 4 years (2009-2012) and standardized across each sink sample site. Diagonal values represent self-recruitment.

| SINK | SOURCE       |              |              |              |              |              |              |              |              |              |              |              |              |              |              |
|------|--------------|--------------|--------------|--------------|--------------|--------------|--------------|--------------|--------------|--------------|--------------|--------------|--------------|--------------|--------------|
|      | P1           | P2           | P3           | P4           | P5           | E1           | E2           | E3           | E4           | E5           | W1           | W2           | W3           | W4           | W5           |
| P1   | <b>0.000</b> | 0.021        | 0.634        | 0.180        | 0.009        | 0.031        | 0.037        | 0.004        | 0.008        | 0.000        | 0.010        | 0.010        | 0.027        | 0.014        | 0.015        |
| P2   | 0.000        | <b>0.066</b> | 0.731        | 0.159        | 0.004        | 0.000        | 0.007        | 0.000        | 0.000        | 0.000        | 0.020        | 0.004        | 0.004        | 0.000        | 0.004        |
| P3   | 0.000        | 0.697        | <b>0.082</b> | 0.000        | 0.042        | 0.042        | 0.000        | 0.000        | 0.000        | 0.000        | 0.138        | 0.000        | 0.000        | 0.000        | 0.000        |
| P4   | 0.000        | 0.555        | 0.000        | <b>0.305</b> | 0.140        | 0.000        | 0.000        | 0.000        | 0.000        | 0.000        | 0.000        | 0.000        | 0.000        | 0.000        | 0.000        |
| P5   | 0.000        | 0.911        | 0.015        | 0.056        | <b>0.000</b> | 0.015        | 0.000        | 0.000        | 0.000        | 0.000        | 0.004        | 0.000        | 0.000        | 0.000        | 0.000        |
| E1   | 0.140        | 0.210        | 0.185        | 0.071        | 0.136        | <b>0.005</b> | 0.009        | 0.116        | 0.100        | 0.028        | 0.000        | 0.000        | 0.000        | 0.001        | 0.000        |
| E2   | 0.126        | 0.025        | 0.001        | 0.123        | 0.113        | 0.161        | <b>0.000</b> | 0.000        | 0.024        | 0.007        | 0.130        | 0.111        | 0.084        | 0.063        | 0.031        |
| E3   | 0.437        | 0.029        | 0.118        | 0.246        | 0.008        | 0.027        | 0.002        | <b>0.012</b> | 0.001        | 0.006        | 0.025        | 0.024        | 0.031        | 0.019        | 0.016        |
| E4   | 0.002        | 0.016        | 0.102        | 0.116        | 0.001        | 0.084        | 0.001        | 0.141        | <b>0.213</b> | 0.260        | 0.008        | 0.013        | 0.016        | 0.017        | 0.009        |
| E5   | 0.035        | 0.093        | 0.199        | 0.268        | 0.000        | 0.017        | 0.000        | 0.109        | 0.026        | <b>0.186</b> | 0.011        | 0.008        | 0.024        | 0.017        | 0.006        |
| W1   | 0.113        | 0.000        | 0.000        | 0.000        | 0.000        | 0.044        | 0.070        | 0.118        | 0.150        | 0.125        | <b>0.133</b> | 0.086        | 0.138        | 0.017        | 0.006        |
| W2   | 0.171        | 0.000        | 0.000        | 0.000        | 0.000        | 0.035        | 0.022        | 0.059        | 0.204        | 0.079        | 0.140        | <b>0.067</b> | 0.138        | 0.083        | 0.002        |
| W3   | 0.002        | 0.000        | 0.000        | 0.000        | 0.000        | 0.179        | 0.065        | 0.015        | 0.012        | 0.047        | 0.337        | 0.207        | <b>0.057</b> | 0.046        | 0.035        |
| W4   | 0.073        | 0.000        | 0.000        | 0.000        | 0.000        | 0.023        | 0.131        | 0.119        | 0.080        | 0.091        | 0.099        | 0.058        | 0.170        | <b>0.151</b> | 0.005        |
| W5   | 0.036        | 0.000        | 0.000        | 0.000        | 0.000        | 0.016        | 0.036        | 0.084        | 0.040        | 0.146        | 0.153        | 0.048        | 0.165        | 0.170        | <b>0.107</b> |



Table S7 Results from Mantel tests between DOR and  $F_{ST}$  when jackknifing across all loci.

| Loci Removed | Mantel $r$ | $P$   |
|--------------|------------|-------|
| Amil_018     | 0.37263    | 0.004 |
| EST_63       | 0.36209    | 0.002 |
| Amil_022     | 0.39531    | 0.003 |
| Amil_002     | 0.23407    | 0.020 |
| EST_181      | 0.38652    | 0.003 |
| EST_245      | 0.38265    | 0.005 |
| EST_016      | 0.38154    | 0.004 |
| wgs_153      | 0.36847    | 0.003 |
| EST_98       | 0.38915    | 0.003 |

Figure S1 Principle component analyses of three measures of genetic differentiation ( $F_{ST}$ ,  $G_{ST}$ ,  $D_{est}$ )

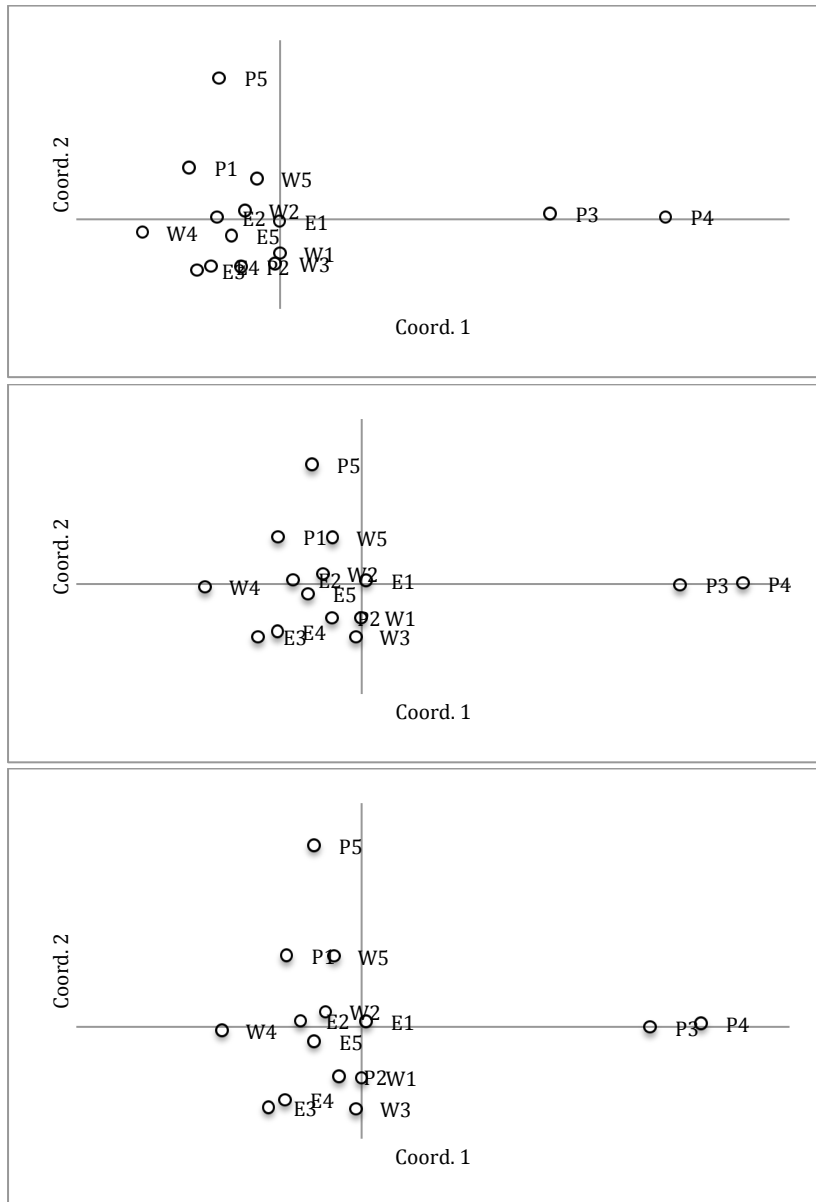

Figure S2 Results from GENELAND identifying  $K = 3$  as the most likely number of clusters in the dataset. Results from 10 independent runs sorted by posterior probabilities are also provided.

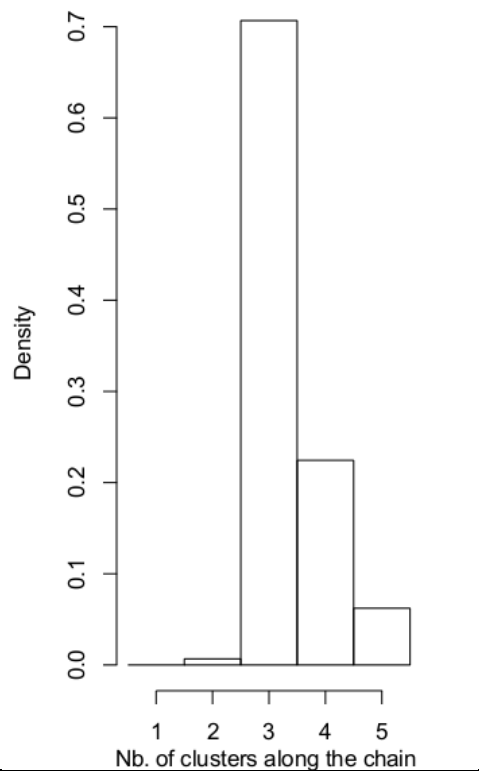

| Replicate | K           | Post. prob.  |
|-----------|-------------|--------------|
| 10        | 3 ( 73.6 %) | -8254.622905 |
| 1         | 4 ( 50.2 %) | -8554.019901 |
| 8         | 3 ( 49.5 %) | -8561.681974 |
| 6         | 2 ( 44.8 %) | -8650.811328 |
| 5         | 4 ( 56.7 %) | -8853.093507 |
| 3         | 3 ( 72.6 %) | -8964.203876 |
| 7         | 3 ( 69.7 %) | -8989.092028 |
| 4         | 3 ( 48.3 %) | -9206.017057 |
| 9         | 1 ( 41.9 %) | -9238.745992 |
| 2         | 3 ( 91.8 %) | -9996.340419 |

Figure S3 Scatterplot showing the relationship between genetic distance matrices based on subsampled v. entire dataset.

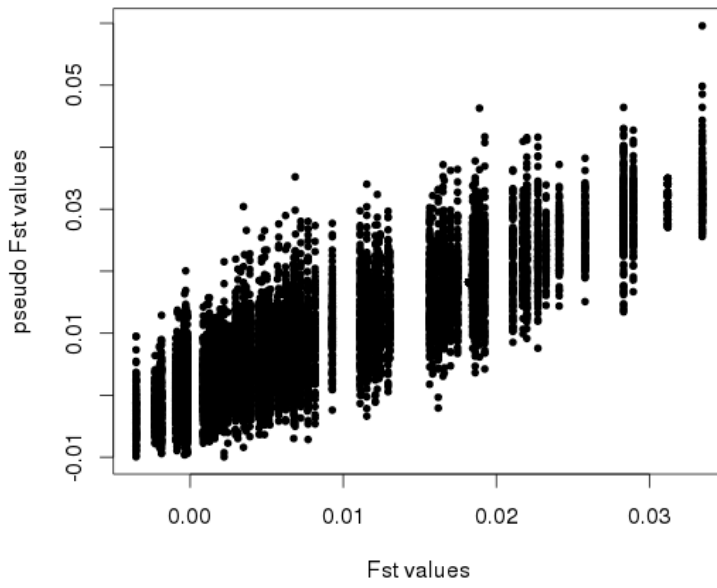



Figure S5 Histograms showing distribution of  $P$  values from the Mantel tests based on the subsampled dataset. Asterisks indicate  $P$  values using the full dataset.

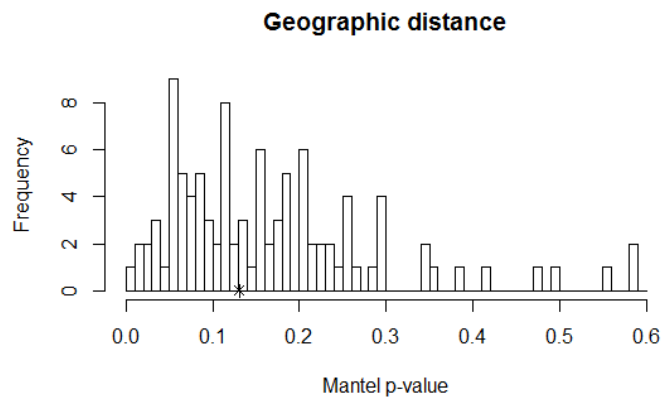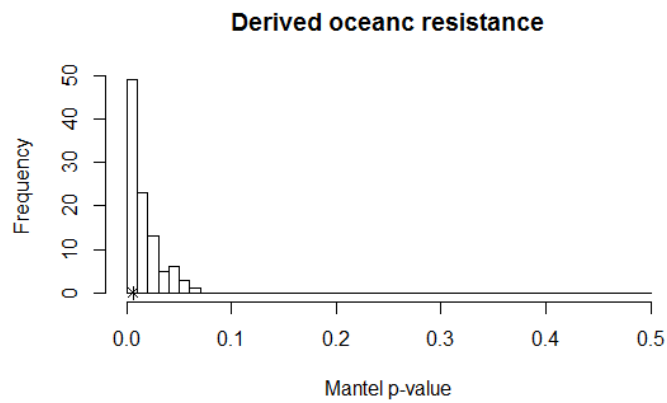

## Text S1 Details of the calculations for the forward projection matrix

The migration matrix was projected forward in time to examine the probability of populations being connected over multiple generations using the formula  $Q_t = \overline{AK}^t$ , where  $A = \overline{MB + I}$  (the top bar indicates row-normalisation) and  $Q_t$  is a state matrix representing the constitution of each adult population at each adult population at time  $t$  (rows) in terms of the relative contribution from each source population at  $t = 0$  (columns),  $B$  is a diagonal matrix of per capita birth rates,  $K$  is a diagonal matrix of relative carrying capacity and  $I$  is an identity matrix with the same dimension as  $M$ , and  $t$  is the number of generations projected [62]. The forward-projected matrix was calculated using  $t = 10$ , and identity matrices were applied for  $B$  and  $K$  since turnover rates were assumed constant at one juvenile per individual per generation, and all populations were assumed to be equal in size. When using higher birth rates the matrix rapidly converged to the eigenvalues and so higher values were avoided. The projection model does not take into account post-settlement mortality, which would act to slow the rate of convergence; however, without any spatial biases the relative patterns would not be affected.
